# Supplementary material for: Characterization of Epithelial Progenitors in Normal Human Palatine Tonsils and Their HPV16 E6/E7-Induced Perturbation
Source: PubMed Central journal article supplement — Stem Cell Reports. 2015 Oct 29;5(6):1210–25. doi: 10.1016/j.stemcr.2015.09.020 (PMC4682068; doi:10.1016/j.stemcr.2015.09.020), 2015-10-29
Supplement: mmc1.pdf [file mmc1.pdf]

**Stem Cell Reports**

**Supplemental Information**

**Characterization of Epithelial Progenitors in Normal Human  
Palatine Tonsils and Their HPV16 E6/E7-Induced  
Perturbation**

**Sung Yoon Catherine Kang, Nagarajan Kannan, Lewei Zhang, Victor Martinez, Miriam P.  
Rosin, and Connie J. Eaves**

## Supplemental Figures

## Figure S1

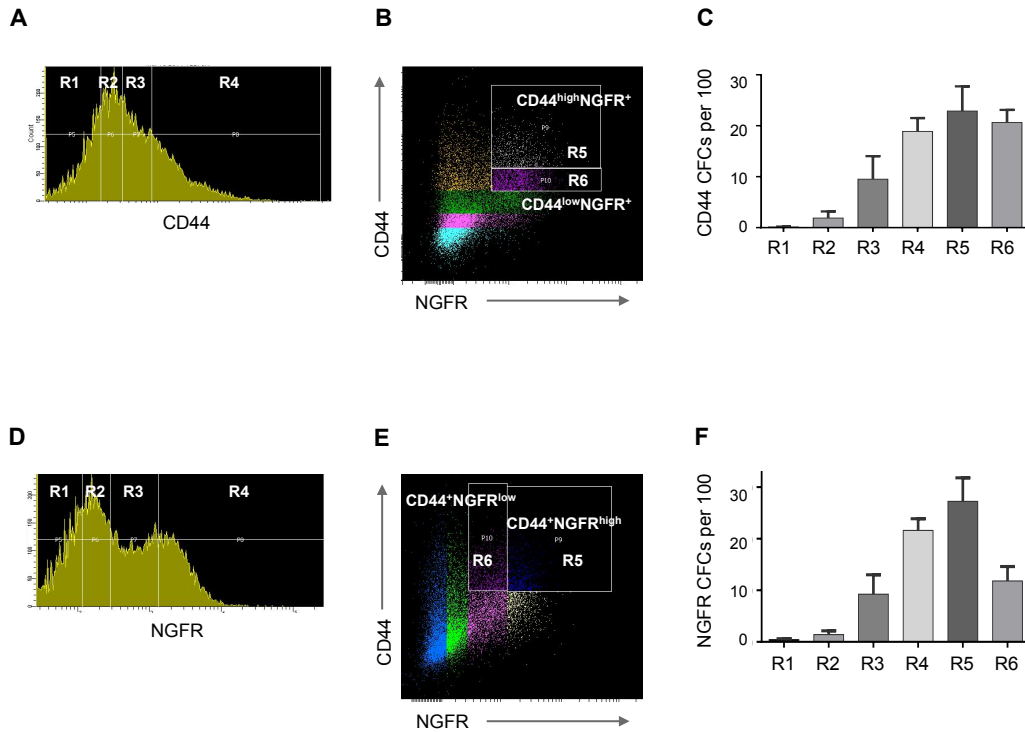

### Figure S1. Functional comparison of subsets defined by expression of CD44 or NGFR, Related to Figure 4

(A-B) FACS plots showing the gating strategies used to separate 6 subsets defined by CD44 expression within the CD45<sup>+</sup>CD31<sup>-</sup> population.

(C) CFC frequencies in each of the 6 subpopulations shown in A and B (n = 4).

(D-E) FACS plots showing the gating strategies used to separate 6 subsets defined by NGFR expression within the CD45<sup>+</sup>CD31<sup>-</sup> population.

(F) CFC frequencies in each of the 6 subpopulations shown in D and E (n = 4).

**Figure S2**

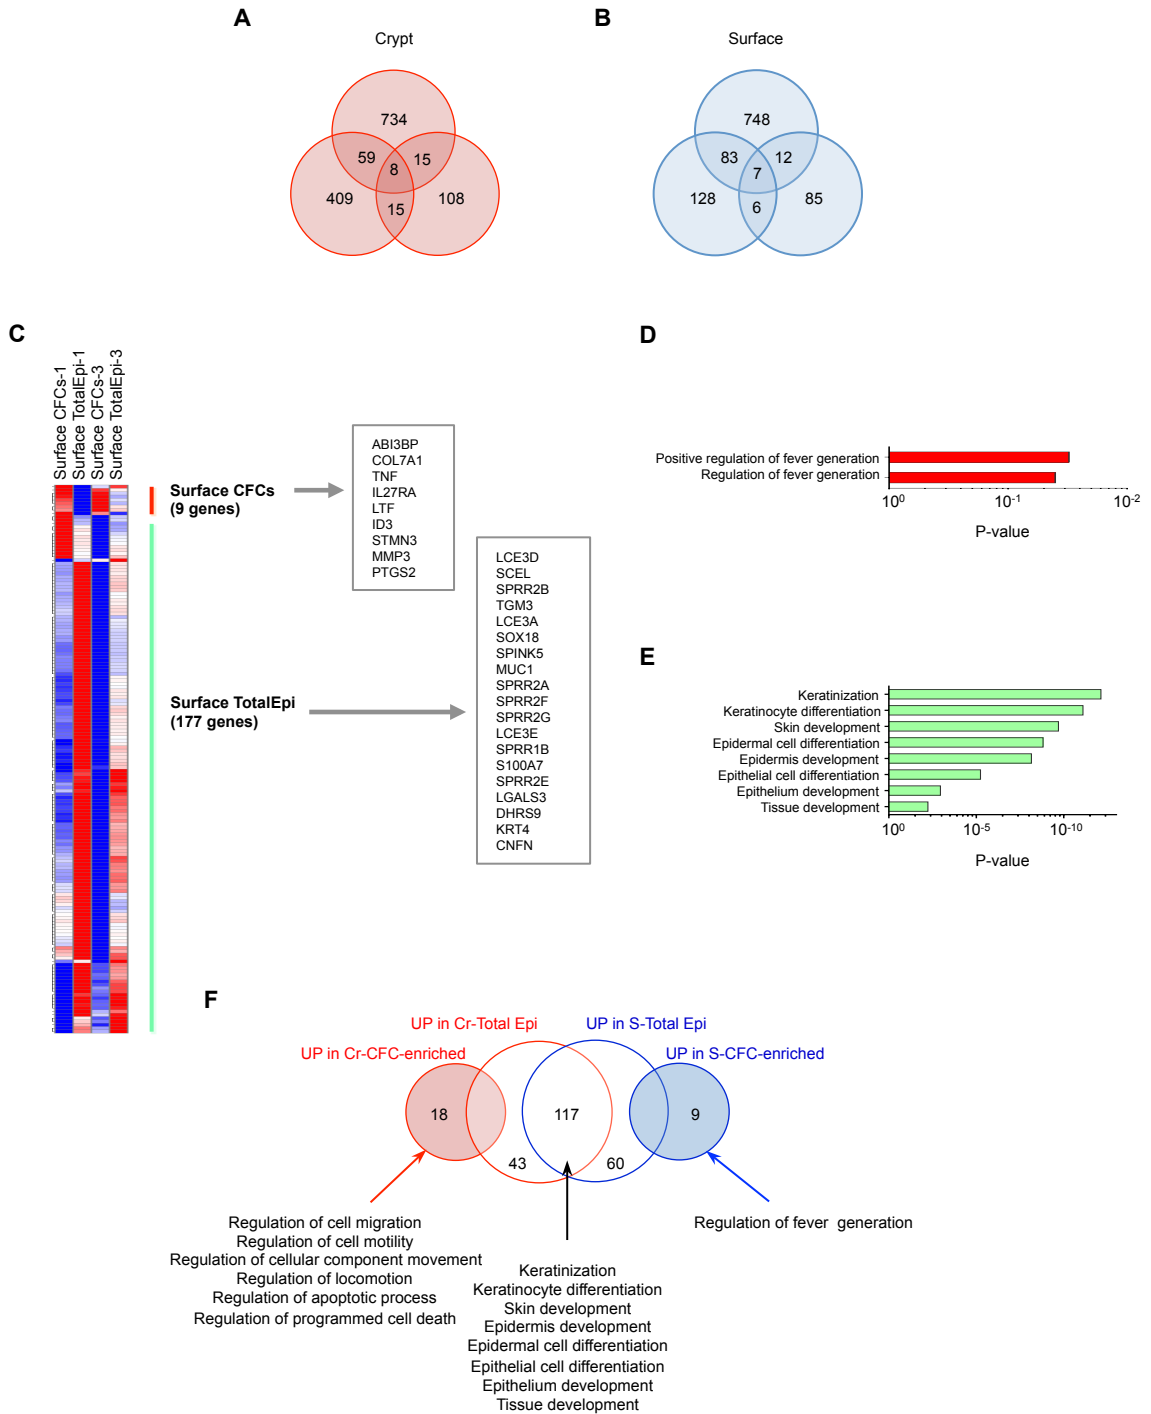

**Figure S2. Transcriptome analysis of different subsets of human tonsillar cells, Related to Figure 6**

(A) Number of genes overexpressed by  $\geq 1.5$ -fold in crypt CD44<sup>+</sup>NGFR<sup>+</sup> cells compared to their surface counterparts, with overlap shown for 3 donors.

(B) Number of genes overexpressed by  $\geq 1.5$ -fold in surface CD44<sup>+</sup>NGFR<sup>+</sup> cells compared to their crypt counterparts, with overlap shown for 3 patients.

(C) Hierarchical cluster analysis of surface CD44<sup>+</sup>NGFR<sup>+</sup> cells and their respective TotalEpi subsets for genes that displayed 2-fold or higher differential expression ( $n = 2$ ; red, genes commonly overexpressed in the CD44<sup>+</sup>NGFR<sup>+</sup> cells; green, genes commonly overexpressed in TotalEpi cells;  $p \leq 0.05$ ).

(D) The top biological GO categories found to be upregulated in the CD44<sup>+</sup>NGFR<sup>+</sup> surface cells as compared to the TotalEpi cells.

(E) The top biological GO categories upregulated in the surface epithelial-enriched subsets cells as compared to CD44<sup>+</sup>NGFR<sup>+</sup> cells.

(F) A summary of Figures 6E-6G and Figures S3C-S3E. The areas indicated by the red or blue arrows represent the transcripts that are more highly expressed in the CD44<sup>+</sup>NGFR<sup>+</sup> crypt (Cr) or surface (S) cells, respectively, by  $>2$ -fold (compared to the TotalEpi cells). The region indicated by a black arrow shows the number of transcripts that are highly expressed in the TotalEpi subsets (compared to the CD44<sup>+</sup>NGFR<sup>+</sup> cells) that are common to both the TotalEpi crypt and surface cells.

**Figure S3**

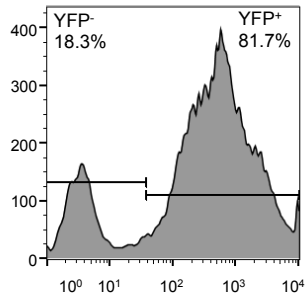

**Figure S3. FACS analysis of cells infected with lentiviral E6/E7-YFP vectors and analyzed on day 4 post-infection, Related to Figure 7**

## Supplemental Tables

| Marker     | CL | Surface epithelium |           |                 |           |           |           |             |           | Crypt epithelium |           |           |           |             |           |
|------------|----|--------------------|-----------|-----------------|-----------|-----------|-----------|-------------|-----------|------------------|-----------|-----------|-----------|-------------|-----------|
|            |    | Basal layer        |           | Parabasal layer |           | Mid layer |           | Upper layer |           | Basal layer      |           | Mid layer |           | Upper layer |           |
|            |    | % Pos              | intensity | % Pos           | intensity | % Pos     | intensity | % Pos       | intensity | % Pos            | intensity | % Pos     | intensity | % Pos       | intensity |
| CK5        | C  | 4                  | ++/+++    | 4               | ++/+++    | 3         | +/++      | 0           | -         | 4                | ++/+++    | 4         | ++/+++    | 3           | ++/+++    |
| CK14       | C  | 4                  | +++       | 4               | +++       | 4         | +++       | 3           | +++       | 4                | +++       | 4         | +++       | 4           | +++       |
| CK19       | C  | 4                  | ++        | 1               | ±         | 1         | ±         | 0           | -         | 3                | ++        | 4         | +++       | 2           | ++        |
| CD44       | M  | 4                  | +++       | 4               | +++       | 3         | ++        | 0           | -         | 4                | +++       | 4         | ++        | 0/1         | +/-       |
| NGFR       | M  | 4                  | +++       | 0               | -         | 0         | -         | 0           | -         | 3                | ++        | 2         | +         | 0           | -         |
| P63        | N  | 4                  | +++       | 4               | +++       | 3         | ++        | 0           | -         | 4                | +++       | 3         | +++       | 2           | +++       |
| CK8/18     | C  | 4                  | ±         | 4               | +         | 3         | +         | 0           | -         | 2                | ++        | 4         | +++       | 3           | +++       |
| CK13       | C  | 4                  | ±         | 4               | ++        | 4         | ++        | 4           | +++       | 4                | ±         | 4         | ++/+++    | 4           | +++       |
| CK4        | C  | 0                  | -         | 1               | +         | 4         | ++        | 3           | +         | 0                | -         | 4         | +++       | 4           | ++/+++    |
| Involucrin | C  | 0                  | -         | 3               | +++       | 4         | +++       | 4           | +++       | 4                | ++        | 4         | +++       | 4           | +++       |
| MUC1       | M  | 1                  | ±         | 3               | +         | 4         | ++        | 4           | +++       | 4                | ++        | 4         | +++       | 4           | +++       |
| Ki67       | N  | 0                  | -         | 4               | +++       | 0         | -         | 0           | -         | 4                | +++       | 3         | +++       | 1           | ++        |

**Table S1. Immunohistological examination of human tonsillar epithelium, Related to Figure 1**

Cellular locations, percent positivity and staining intensity of each marker tested by IHC. CK5, cytokeratin-5; CK14, cytokeratin-14; CK19, cytokeratin-19; NGFR, nerve growth factor receptor; CK8/18, cytokeratin-8/18; CK13, cytokeratin-13; CK4, cytokeratin-4; MUC1, Mucin 1; CL, cytological location: M, membranous; C, cytoplasmic; N, nuclear. % Pos, percentage of stained cells: 0, no staining; 1, ≤30% cells stained; 2, 30 to 50% cells stained; 3, 50 to 70%; 4: 70 to 100%. Intensity: -, negative; ±, equivocal; +, weak; ++, moderate; +++, strong.

|            | CD44 <sup>-</sup> NGFR <sup>-</sup> |        |        | CD44 <sup>+</sup> NGFR <sup>-</sup> |        |        | CD44 <sup>+</sup> NGFR <sup>+</sup> |       |        | CD44 <sup>-</sup> NGFR <sup>+</sup> |        |        |
|------------|-------------------------------------|--------|--------|-------------------------------------|--------|--------|-------------------------------------|-------|--------|-------------------------------------|--------|--------|
|            | U (%)                               | S (%)  | Cr (%) | U (%)                               | S (%)  | Cr (%) | U (%)                               | S (%) | Cr (%) | U (%)                               | S (%)  | Cr (%) |
| CK19       | ND                                  | 17, 40 | 19     | 52                                  | 40     | 56     | 72                                  | 74    | 95     | ND                                  | 32, 94 | 89, 92 |
| CK5        | ND                                  | 5, 6   | 8      | ND                                  | 10     | 20, 23 | 69                                  | 70    | 85     | ND                                  | 25, 20 | 28     |
| p63        | 49                                  | 10     | 90     | 60, 84                              | ND     | 80     | 94                                  | 90    | 100    | 35                                  | 36, 51 | ND     |
| Involucrin | 21                                  | ND     | 21, 17 | 14                                  | ND     | 12, 20 | 96                                  | 20    | 69     | ND                                  | 8      | 14, 17 |
| CK4        | 27                                  | 22, 42 | ND     | ND                                  | 14, 19 | 20     | 26                                  | 28    | 86     | 74                                  | 41     | 51     |

**Table S2. IHC analysis of freshly sorted and cytopun CD45<sup>+</sup>CD31<sup>-</sup> subpopulations defined by CD44 and NGFR, Related to Figure 2**

The proportion of cells positive for each marker tested with the site of origin specified. U, unseparated; S, surface; Cr, crypt; ND, not done.
